# Supplementary material for: Sol–gel synthesis, structural, optical and magnetic characterization of Ag3(2+x)PrxNb4−xO11+δ (0.0 ≤ x ≤ 1.0) nanoparticles
Source: Royal Society of Chemistry journal article supplement (doi:10.1039/c5ra24925b), 2016-01-01
Supplement: c5ra24925b1.pdf [file c5ra24925b1.pdf]

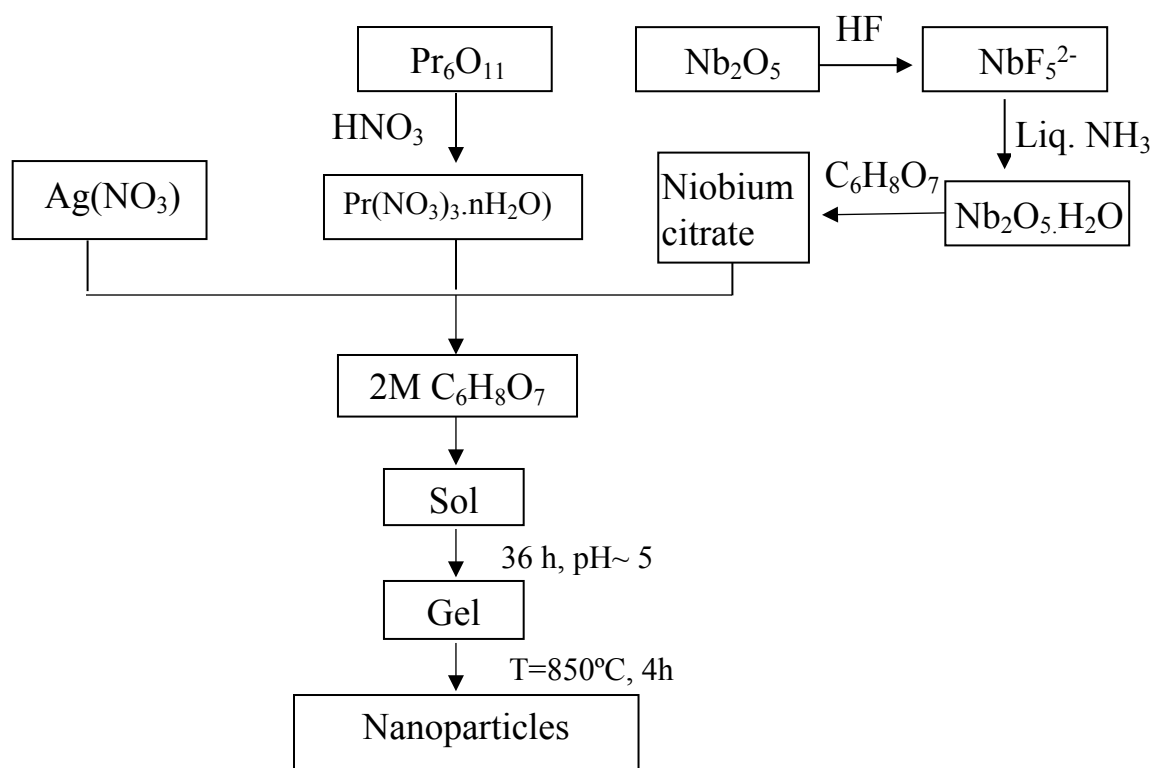

**Figure SF1.** Flow chart of the synthesis of  $\text{Ag}_{3(2+x)}\text{Pr}_x\text{Nb}_{4-x}\text{O}_{11+\delta}$   
( $0.0 \leq x \leq 1.0$ ) (S1-S3) nanoparticles

Table ST1. The calculated amount precursors of  $\text{Ag}_3(2+x)\text{Pr}_x\text{Nb}_4-x\text{O}_{11+\delta}$  (0.0, 0.25 and 1.0) (S1-S3) nanoparticles.

| Sample code | Compositional formula                                               | Starting materials  |                                |                             |
|-------------|---------------------------------------------------------------------|---------------------|--------------------------------|-----------------------------|
|             |                                                                     | $\text{AgNO}_3$ (g) | $\text{Pr}_6\text{O}_{11}$ (g) | $\text{Nb}_2\text{O}_5$ (g) |
| S1          | $\text{Ag}_6\text{Nb}_4\text{O}_{11}$                               | 4.2651              | -                              | 2.2246                      |
| S2          | $\text{Ag}_{7.5}\text{Pr}_{0.5}\text{Nb}_{3.5}\text{O}_{11+\delta}$ | 2.9299              | 0.3082                         | 1.6845                      |
| S3          | $\text{Ag}_9\text{Pr}_1\text{Nb}_3\text{O}_{11+}$                   | 3.0988              | 0.5433                         | 1.2725                      |
